# Supplementary material for: Variability in a four-network composite of atmospheric CO 2 differences between three primary baseline sites
Source: Copernicus journal article supplement (doi:10.5194/acp-2019-300), 2019-05-15
Supplement: Supplementary file [file acp-2019-300-AC1-supplement.pdf]

# Variability in a four-network composite of atmospheric CO<sub>2</sub> differences between three primary baseline sites

Roger J. Francey, Jorgen S. Frederiksen, L. Paul Steele and Ray L. Langenfelds

CSIRO Oceans and Atmosphere, Aspendale, Victoria, AUSTRALIA

5 Correspondence to: Roger J. Francey (roger.francey@csiro.au)

**Abstract.** Spatial differences in the monthly baseline CO<sub>2</sub> since 1992 from Mauna Loa, (mlo, 19.5°N, 155.6°W, 3379m), Cape Grim (cgo, 40.7°S, 144.7°E, 94m) and South Pole (spo, 90°S, 2810m), are examined for consistency between four monitoring networks. For each site pair, a composite based on the average of NOAA, 10 CSIRO and two independent SIO analysis methods is presented. Averages of the monthly standard deviations are 0.25, 0.23 and 0.16 ppm for mlo-cgo, mlo-spo and cgo-spo respectively. This high degree of consistency and near-monthly temporal differentiation (compared to CO<sub>2</sub> growth rates) provides an opportunity to use the composite differences for verification of global carbon cycle model simulations.

Interhemispheric CO<sub>2</sub> variation is predominantly imparted by the mlo data. The peaks and dips of the seasonal 15 variation in interhemispheric difference act largely independently. The peaks mainly occur in May, near the peak of Northern Hemisphere terrestrial photosynthesis/respiration cycle. Feb-Apr is when interhemispheric exchange via eddy processes dominates, with increasing contributions from mean transport via the Hadley circulation into boreal summer (May-Jul). The dips occur in September, when the CO<sub>2</sub> partial pressure difference is near zero. The cross-equatorial flux variation is large and sufficient to significantly influence short- 20 term Northern Hemisphere growth rate variations. However, surface-air terrestrial flux anomalies would need to be up to an order of magnitude larger than found to explain the peak and dip CO<sub>2</sub> difference variations.

Features throughout the composite CO<sub>2</sub> difference records are inconsistent in timing and amplitude with air- surface fluxes but are largely consistent with interhemispheric transport variations. These include greater variability prior to 2010 compared to the remarkable stability in annual CO<sub>2</sub> inter-hemispheric difference in the 25 5-year relatively El Niño-quiet period 2010-2014 (despite a strong La Nina in 2011), and the 2017 recovery in the CO<sub>2</sub> interhemispheric gradient from the unprecedented El Niño event in 2015-16.

## 1 Introduction

30 Atmospheric CO<sub>2</sub> measurements are normally introduced into global carbon budgets as a “global growth rate ... based on the average of multiple stations selected from the marine boundary layer sites with well mixed background air .., after fitting each station with a smoothed curve as a function of time, and averaging by latitude band ...” (Le Quéré et al., 2018). This approach encourages sampling at multiple locations to seek atmospheric confirmation of national/continental emission changes. Particularly in the Northern Hemisphere  
35 (NH), with more complicated geography and atmospheric circulation, the influence of continental emissions on marine boundary layer air can vary widely between sites.

A clearer indication of the global impact of regional emissions comes from sites demonstrating maximum spatial representation. In this case, global significance of biogeochemical CO<sub>2</sub> exchanges between the surface will be informed by their impact on validated baseline data with the least continental influence. Such baseline  
40 data is more directly relevant to changes in global ocean acidification and climate change, but places heightened demands on sampling criteria and calibration.

Sites selected to maximise spatial representation in their respective hemispheres, Mauna Loa, (mlo, 19.5°N, 155.6°W, 3379m) and South Pole (spo, 90°S, 2810m) also have the longest (multi-decadal) coherent trace gas monitoring data, based on flask sampling (Supplement S1). At these sites, and at Cape Grim (cgo, 40.7°S,  
45 144.7°E, 94m) since 1991, co-sampled baseline air has been analysed at three different laboratories, using four different methodologies summarized in Section 2.

To account for any persisting artefacts in the co-sampled data we examine, for each method, inter-site differences in the published monthly baseline data from the three sites. The standard deviation in the average of the co-sampled differences provides a practical uncertainty estimate. A key advantage compared to the growth  
50 rate approach, is that assumptions inherent in the growth rate smoothing (where for example 22-month smoothing is used to separate interannual and seasonal variations) are avoided so that in this study near-monthly effective time resolution is achieved.

The inter-site difference approach was used by Francey and Frederiksen, 2016 (FF16) to conclude that the suppression of the normal eddy component of interhemispheric (IH) CO<sub>2</sub> exchange in Feb-Apr 2010 contributed  
55 to the unprecedented 0.8 ppm step in the IH difference between 2009 and 2010. The dynamical anomaly was associated with a moderately strong El Niño leading to a NH build-up of CO<sub>2</sub> in 2010. FF16 supplementary information demonstrated a failure of atmospheric transport models of the carbon cycle to simulate the step.

The 2015/16 El Niño was stronger and has also been associated with unprecedented behaviour in the global carbon cycle (elsewhere attributed to the terrestrial biosphere anomalies, e.g. Yue et al., 2017). However,  
60 Frederiksen and Francey, 2018 (FF18), argued that the unprecedented strength in the Hadley circulation increased IH exchange (reduced IH CO<sub>2</sub> difference) late in 2016, overwhelming the earlier reduced eddy exchange linked to the strong 2015/16 El Niño. They also indicated dynamical contributions to IH CO<sub>2</sub> during both El Niño and La Niña periods (e.g. FF16 Figure 5, and FF18 section 6.2, on multi-species IH differences). While ENSO events are expected to impact on surface biology, it is also clear that they also influence  
65 atmospheric IH CO<sub>2</sub> fluxes. The timing of the dynamical events suggests an alternate explanation for the CO<sub>2</sub> behaviour discussed by Yue et al., if it can be demonstrated that IH CO<sub>2</sub> fluxes at the time exceed their postulated air-surface terrestrial fluxes.

The scope of this paper includes: a) reduction of measurement uncertainties in IH CO<sub>2</sub> difference using a three decade composite of published CO<sub>2</sub> measurement results (distinguished by maximum spatial representation and  
70 by well-documented sampling and measurement quality), and b) demonstration of the potential uses of the

composite CO<sub>2</sub> record by comparing anomalies in the magnitude and phasing of composite IH CO<sub>2</sub> variations with those in air-surface exchange model outputs, as well as in dynamics indices representing atmospheric IH exchange.

## 75 **2 Background information on flask networks**

A historic overview of CO<sub>2</sub> IH difference data is provided in Supplement S1.

By 1958 C.D. Keeling had identified mlo and spo as optimum sites to obtain background CO<sub>2</sub> in the respective hemispheres and by the 1970s was obtaining a regular monthly supply of air admitted to 5L evacuated glass flasks from both sites (SIO1: Keeling C. D. et al., 2001). Since 1992, there are CO<sub>2</sub> measurements as a by-  
80 product of a global network focussed on O<sub>2</sub>/N<sub>2</sub> ratios in baseline air (SIO2: Keeling R. F. and Schertz, 1992); this program uses 5L glass flasks flushed and filled to ambient pressure, with cryogenically dried air. While there is commonality regarding calibration, in the context of spatial differences the SIO networks can be considered independent.

NOAA began sampling from all three sites, mlo, spo, cgo, (as part of a much larger network) from 1984, using a  
85 variety of flask and filling methods. From around 1992 the current system of Peltier-dried air in pressurized 2.5 L flasks (Tans et al., 1992, Conway et al., 1994, Dlugokencky et al., 2014) was phased in. NOAA has maintained the World Meteorological Organization (WMO) Central CO<sub>2</sub> Calibration Laboratory since 1996 (a role previously carried out by SIO). The NOAA atmospheric sampling is generally more frequent (typically 8-10 flasks per month) than is the case for the SIO or CSIRO programs (except for the CSIRO cgo program);  
90 however, the size and sampling frequency in the NOAA network amplifies calibration challenges due to shorter lifetimes of reference and calibration standards.

Both NOAA and SIO use non-dispersive infra-red analysers (NDIR) for CO<sub>2</sub> measurement. CSIRO flask sampling at cgo, spo and mlo in the early 1980s used NDIR for analysis of chemically dried air, pressurized into 5L glass flasks. Analyses here are restricted to CSIRO's measurements from 1992 using chemically-dried,  
95 pressurized air in 0.5L glass flasks, but with retention of 5L flasks at spo (Francey et al., 1996). Gas chromatography with flame ionisation detection (GC/FID) was introduced to measure CO<sub>2</sub> in flasks, a technique providing a more linear response than NDIR (Supplement S2). Hourly radon measurements at Cape Grim (Chambers et al. 2016) were introduced around this time. Air mass history is further informed by a decade of vertical profiling (Langenfelds, 2003; Pak, 1996), back trajectory analysis, and other tracers (e.g. Dunse et al.,  
100 2001), demonstrating that selected cgo data can achieve a degree of spatial representation matching, or sometime exceeding, that at the more remote high-altitude sites at mlo and spo.

Apart from longevity, the flask records offer other advantages over in-situ monitoring, but are more susceptible to some unfavorable factors as are discussed in Supplement S3. The challenges of maintaining high quality over decades in any one monitoring program are many. They include external factors, acknowledged but not pursued  
105 here, such as high turnover of skilled staff particularly at remote air sampling sites or changes in institutional strategic and economic priorities. The latter are well described by Keeling (1998), with CSIRO sharing similar institutional experiences.

## **3 Network intercomparison**

110 NOAA, which has the most extensive global network and since 1996 has also operated the WMO CO<sub>2</sub> Central Calibration laboratory, is selected as the reference for an initial inter-network comparison. For each of the three baseline sites, Figure 1 shows systematic behaviour in the SIO1, SIO2 and CSIRO monthly CO<sub>2</sub> differences from NOAA. Five-month running means aid discussion. The CO<sub>2</sub> mixing ratios used here are referred to in the commonly used units of parts per million (ppm) rather than the more strictly correct term of  $\mu\text{mole of CO}_2$  per mole of dry air. Note that data independently flagged for sampling or measurement anomalies are rejected by individual laboratories prior to publication as monthly averages. Typically, a small number of gross outliers in individual flask data (e.g. in flask-pair differences) are also rejected prior to publication.

115 There is clear evidence of systematic differences: in mean offsets, seasonality, and between sites within one network. In the context of inter-hemispheric exchange, the typical 0.5 ppm range of variation remains relatively small compared to the 7-10 ppm maximum CO<sub>2</sub> interhemispheric difference (IH  $\Delta\text{CO}_2$ ). Net IH exchange is proportional to IH partial pressure difference.

- Between 1991-1993, there is a marked inconsistency between NOAA mlo-spo and mlo-cgo, particularly in seasonal amplitude; CSIRO has comparable measurements that are more consistent (Supplement S4). This is a reason for caution when interpreting the data in this period.
- 125 • In the post-1996 statistics the SIO1 offsets from NOAA behave similarly for mlo and spo. This is not the case for SIO2, which has similar offsets at mlo (-0.18 ppm) and cgo (-0.19 ppm), but not at spo (-0.04 ppm), or for CSIRO (mlo: -0.08 ppm, cgo: +0.01 ppm, spo: +0.13 ppm).
- CSIRO records at cgo exhibit the smallest offset and scatter relative to NOAA ( $\pm 0.08$  ppm) while SIO2 mlo data exhibit the largest scatter ( $\pm 0.37$  ppm).
- 130 • Remnant seasonality is still evident in the CSIRO cgo differences from NOAA. While a small effect, the CSIRO GC/FID near-linear response for CO<sub>2</sub> means results are not so sensitive to differences between sample and reference CO<sub>2</sub>. This advantage is reinforced in the CSIRO SH data since reference gases use recent SH baseline air. This is generally not the case for non-linear NDIR measurement and particularly in the NH if relatively short-lived reference gases sourced in the NH have a less-than-optimum match with ambient CO<sub>2</sub> from a site.
- 135

While Figure 1 reveals some un-resolved systematic differences between data sets, Figure 2 emphasizes that they are generally small compared to the IH partial pressure differences that are a pre-requisite for IH net exchange. Data from each method are presented as 3-month seasonal averages to minimize potential influences related to network sample-frequency (by ensuring an adequate number of individual flask samples per season). As well, the particular 3-month seasonal selection distinguishes periods of distinct relatively stable partial pressure differences between hemispheres and the selected seasons also distinguish eddy and mean IH transport mechanisms (FF18).

Figure 2 demonstrates the considerable coherence between data sets.

- 145 • For the most part, and particularly in the Aug-Oct season when IH CO<sub>2</sub> difference (IH  $\Delta\text{CO}_2$ ) is at a minimum, there is a high level of consistency in the year-to-year variation in seasonal spatial differences from each network.
- There are relatively few examples of one record differing markedly from the others; when it occurs, it is often for reasons evident in Figure 1. For example, in Figure 2 NOAA cgo-spo appears low in 1992/1993; CSIRO mlo-spo shows negative outliers in May-Jul 2009 and Nov-Jan 2002, but not for mlo-cgo. SIO2 outliers in 2002 and 2006 exhibit similar characteristics; positive outliers, e.g. SIO2 from
- 150

Nov-Jan 2016, suggest a cgo problem. In Feb-Apr 2005 NOAA data indicate a possible mlo problem; however, this is also when the ‘volatility’ of the records (and in IH transport) is large, so it is conceivable that different flask sampling numbers and times could contribute to lower values by both SIO and CSIRO.

- The largest IH  $\Delta\text{CO}_2$  variability is recorded in Feb-Apr and in May-Jul, both seasons having near-equally large IH differences. The large seasonality in NH  $\text{CO}_2$  is widely linked to the photosynthesis/ respiration in NH forests. Feb-Apr is also when IH exchange by eddy processes is most influential (FF16), whereas mean transport via the Hadley circulation is the main dynamical influence in May-Jul (FF18).

Systematic differences due to sampling and measurement methodology can possibly arise from factors such as the linearity of instrument response, flask storage effects or undetected entrainment of laboratory air. Records with the sparsest sample density (e.g. at spo and particularly in CSIRO spo data) may be more susceptible to undetected anomalies. Closer inspection of individual flask metadata, or of the less extensive *in situ* monitoring, may resolve some of these infrequent anomalies, but for the present, composite averaging of the flask data is relied on to moderate their influence.

#### 4 Composite records of baseline station spatial differences

For each of mlo-cgo, mlo-spo and cgo-spo monthly  $\text{CO}_2$  differences, Table 1 shows the number of months between 1992 and 2017 contributing to a composite value, arranged in columns indicating the number of contributing networks; e.g. 266 of 312 months have 4 networks contributing to mlo-spo, while 279 months have three contributing networks at mlo-cgo.

The percentage of missing months for each network, and scatter in the composite differences for different historic periods are tabulated in Supplement S1.

The monthly composite  $\text{CO}_2$  differences are shown in Figure 3 (and tabulated in Supplement S5). The small error bars represent the ensemble standard deviation. (The one exception is for cgo-spo in Feb 2009, with only the NOAA network contributing. It is arbitrarily assigned 100% uncertainty and appears as an outlier in Figure 3c). The seasonality at mlo, generally attributed to the NH forest photosynthesis/respiration cycle, is the dominant variation in IH  $\Delta\text{CO}_2$ . The composite uncertainties are small compared to seasonal amplitudes, especially for the IH differences. Average standard deviations of mlo-cgo, mlo-spo and cgo-spo are 0.25, 0.23 and 0.16 ppm respectively. Systematic inter-annual variability is well-defined and is reflected similarly in both IH records and is consistent with mlo driving most of the seasonal variation.

Variations that exceed the ensemble monthly standard deviations include:

- The overall increase in IH difference, generally attributed mainly to increasing NH fossil fuel  $\text{CO}_2$  emissions, is indicated by a linear regression through the mlo-cgo values (with slope  $0.056 \pm 0.021$  ppm yr<sup>-1</sup>; mlo-spo gives  $0.062 \pm 0.021$  ppm yr<sup>-1</sup>). The slope of such regressions is much higher for the Apr-May data ( $0.087 \pm 0.011$  ppm yr<sup>-1</sup>) than for Sep-Oct data ( $0.049 \pm 0.011$  ppm yr<sup>-1</sup>).
- From 1992-2017, most minima occur in Sep; of 26 minima, 24 occur in Sep and 2 in Oct (1992 and 1995). Of the 26 maxima 20 are in May, and 6 in Apr (1997, 1999, 2000, 2004, 2005, 2016).
- Scatter in the amplitude of seasonal maxima (boreal winter/spring) is smaller before 1999. The step-like behaviour in Apr-May from 2009 to 2010 remains the major anomaly.

- In contrast, the minima (in boreal summer/autumn) exhibit greater scatter before 2011, replaced afterwards by a smooth decline to a marked 2016 minimum, then sudden reset in 2017.
- Unusually low boreal summer/autumn IH minima also occur in 1993-1994. Apart from being a period when measurement and calibration methods were consolidating (as discussed next section) the most significant volcanic influence (Pinatubo) is potentially an influence at this time.

195

A question arises as to how well mlo data represents the NH. Of more relevance to this study is how well do the mlo samples represent air that is transferred into the Southern Hemisphere. Flask samples are collected at mlo above 3 km altitude in down-slope winds, close to the upper troposphere regions where the IH transfer processes defined in FF18 occur (see Figure 5 below), circumstances not shared by other NH surface monitoring sites.

200

Unlike in typical growth rate analyses, the peak and trough values are largely independent. This is visually explored in Figure 3 using plotting software spline polylines linking peaks (solid) and dips (dashed) months of IH  $\Delta\text{CO}_2$ . Trace gas mixing within extra-tropical hemispheres is typically estimated at 1-2 months or less, and inter-hemispheric exchange times estimated at 6-12 months or more (e.g. Bowman and Cowan, 1997; Jacob, 1999). Monthly changes in the peak and trough IH  $\Delta\text{CO}_2$  largely reflect flux changes in or out of the extra-

205

tropical Northern Troposphere close to that month. The following sections seek similarities with possible causal forcing processes.

## 5 Processes influencing CO<sub>2</sub> IH difference variations

Global carbon cycle models generally attribute short term variations in atmospheric CO<sub>2</sub> to exchanges with the terrestrial biosphere (Le Quéré et al., 2018; Rödenbeck et al., 2018; Yue et al., 2017) and implicitly assume model atmospheric transport is correct on all time frames. While the models have demonstrated an impressive ability to predict mid-to-high latitude CO<sub>2</sub> variations influenced by weather, it is less clear that short term variations in IH exchange (of a magnitude sufficient to influence hemispheric growth rates) have been adequately captured.

210

### 5.1 Air-Surface fluxes influencing IH $\Delta\text{CO}_2$ :

215

The relative magnitude and timing of monthly variations IH  $\Delta\text{CO}_2$  are compared to those in the terrestrial biosphere, wild fires and fossil fuel. (Possible contributions from air-sea exchange are discussed below in relation to Figure 8.)

220

The primary determinant of the well-defined seasonality in IH  $\Delta\text{CO}_2$  in Figure 3 is widely attributed to the temperature-moderated photosynthesis/respiration cycle of NH forests. Monthly Dynamic Vegetation Model (DVM) estimates of Net Terrestrial Biosphere Production (NBP) in three latitude bands 90°N-30°N, 30°N-30°S and 30°S-90°S over the 1992-2016 period are obtained using the Community Atmosphere Biosphere Land Exchange (CABLE) model (Kowalczyk et al., 2006; Haverd et al., 2018). In addition, extra-tropical (ET) NBP from an ensemble of 16 Land Surface Models (shown in Figure 2 of Bastos et al., 2018) are considered; because of the small SH contribution, the ensemble ET values are most comparable to CABLE NH NBP. (Note: We do not discuss air-surface fluxes derived from CO<sub>2</sub> data that are less spatially representative, and/or rely on atmospheric transport modelling. The latter introduce additional model degrees of freedom and potentially overestimate terrestrial variability if the variability in atmospheric IH transport is not adequately captured.).

225

NBP signs are reversed and are described as terrestrial-to-air carbon fluxes. Global wildfire emissions from the Global Fire Emissions Database (Randerson et al., 2018, GFED4.1) from 1997-2015 are classified as NH, EQ and EQ/SH. Seasonal anthropogenic emission anomalies are calculated as differences from the detrended 2000 to 2016 monthly data of Oda et al., (2017). For each data set, anomalies (in PgC month<sup>-1</sup>) in seasonal behaviour for each latitude band were determined by subtracting the mean seasonality from the monthly values.

The major seasonal anomalies in NBP and Wildfire emissions that potentially influence IH  $\Delta\text{CO}_2$  are shown in Figures 4(a) and 4(b). The largest anomalous surface-to-air flux is the extreme equatorial emission anomaly from equatorial wildfire in late 1997 (~0.9 PgC over 3 months); it is not associated with unusual behaviour in the IH  $\Delta\text{CO}_2$  records.

Mixing of CO<sub>2</sub> within the extra tropical Northern Hemisphere is as rapid as 1-2 weeks (Jacob, 1999) compared to IH exchange times of greater than 6 months (Bowman and Cowan, 1997). But we see strong correlations with transport for unlagged 3-month averages. Since IH  $\Delta\text{CO}_2$  peaks re-occur within 1 month of the same time each year, close correspondence in timing of terrestrial anomalies and the IH  $\Delta\text{CO}_2$  peaks would be expected if NH terrestrial exchange was the main determinant. This is not evident in Figure 4. More importantly, the amplitude range of terrestrial anomalies appears to be far too small to account for the magnitude of the changes in the peaks and dips of IH  $\Delta\text{CO}_2$ .

Over the last 25 years the annual relationship between global (mainly NH) fossil fuel combustion emissions and IH  $\Delta\text{CO}_2$  has been 2.8 PgC ppm<sup>-1</sup> (equivalent to the 0.36 ppm (PgC)<sup>-1</sup> used by FF18). This is applicable when northern fossil fuel emissions effectively mix globally. The volume of the troposphere north of Mauna Loa is around 33% of the global troposphere, so that on the shorter time frame of within-hemisphere mixing, only ~0.92 PgC is required to change the NH background CO<sub>2</sub> by 1 ppm. In Figure 4(c) we round this to 1 PgC = 1 ppm for simplicity.

A more comprehensive inspection of the seasonal variability in the air-surface fluxes, relative to that in IH  $\Delta\text{CO}_2$ , is displayed in Figure 4(d), which plots the standard deviations of residuals from the mean seasonality, for each month over the available record. As for the peaks and dips, we assume a 1:1 relationship between ppm and PgC month<sup>-1</sup> in IH  $\Delta\text{CO}_2$ . The main variation in IH  $\Delta\text{CO}_2$  occurs in Mar-Apr, when variability in surface-air fluxes is small but variability in eddy IH exchange is large (see below). A second peak in IH  $\Delta\text{CO}_2$  standard deviation occurs Aug-Sep, around the time of the dips (but also when equatorial wild fires are more active suggesting a possible contribution from the equatorial emissions at this time?).

Accepting the precision and near-hemispheric spatial representation of the composite IH  $\Delta\text{CO}_2$  records, these inconsistencies with surface emissions in both timing and magnitude suggest that there are other short-term influences on IH  $\Delta\text{CO}_2$  of greater magnitude than air-surface exchange.

## 260 **5.2 Wind indices reflecting CO<sub>2</sub> IH transport:**

In contrast to the case for air-surface exchanges, there are a number of prominent features in the composite IH  $\Delta\text{CO}_2$  records that are shared with behaviour in the dynamical indices of FF18. Inter-hemispheric exchange of CO<sub>2</sub> occurs mainly by eddy processes in the boreal winter-spring and by mean convection and advection associated with the Hadley circulation in the boreal summer-autumn (FF18 and references therein). FF18 developed wind indices that characterize both types of IH transport based on reanalysis data sets focusing on the National Center for Environmental Prediction (NCEP) and National Center for Atmospheric Research (NCAR) reanalysis (NRR) data (Kalnay et al., 1996). Eddy transport is described by  $u_{\text{duct}}$ , the average 300 hPa zonal

velocity in the Pacific Westerly duct region (Frederiksen and Webster, 1988) of 5°N to 5°S, 140 to 170°W (FF16, FF18). Here we use that index and two of the four indices for mean transport introduced in FF18. These  
270 are  $\omega_p$ , the average 300 hPa vertical velocity in pressure coordinates in the region 10-15°N, 120 to 240°E, and  $v_p$  the average 200 hPa meridional velocity in the region 5-10°N, 120 to 240°E. Figure 5 provides a schematic of the geographical location of regions used by FF18, and time series of the monthly values of wind indices are shown in Figure 6.

The top panel in Figure 6a shows a 3-decade time series of the  $u_{\text{duct}}$  index which characterizes cross-equatorial  
275 Rossby wave dispersion, Rossby wave breaking and corresponding increases in transient kinetic energy and eddy transport in the near-equatorial upper troposphere (Webster and Holton, 1982, Frederiksen and Webster, 1988, Ortega et al., 2018). The large scale Rossby waves are generated by thermal anomalies and topographic features including the Himalayan mountains from which they propagate south-eastward and are able to penetrate into the SH when  $u_{\text{duct}}$  is positive, corresponding to an open Pacific Westerly duct.

280 The  $\omega_p$  and  $v_p$  indices in Figures 6b and 6c describe the strength of the mean transport by the Hadley cell in the Pacific region with negative  $\omega_p$  corresponding to uplift and negative  $v_p$  to north to south transport.

Net interhemispheric trace gas exchange requires a partial pressure difference between hemispheres. For CO<sub>2</sub> the average seasonal cycle of 25-year mean partial pressure difference, represented here by monthly baseline  
mlo-cgo, is shown in Figure 7(a) (mlo-spo is not shown here since it is effectively identical).

285 The positive mean IH  $\Delta\text{CO}_2$  is largely due to fossil fuel emissions. Months of positive (north-south) IH difference are shaded green and only in Sep-Oct is there a small reverse gradient. Transport of CO<sub>2</sub> from the Northern to the Southern Hemisphere occurs when green shaded areas in Fig. 7(a) coincide (on average) with blue shaded areas (Fig. 7(b), via eddy transfer with index  $u_{\text{duct}}$ ), or with red shaded areas (Figs. 7(c) and 7(d), via mean transport with indices  $\omega_p$  and  $v_p$ ).

290 Figure 7 also demonstrates that differences from the long-term mean in transport indices (average for each month) vary between the significant El Niño events in 1998, 2010 and 2016:

- In 2010, the IH  $\Delta\text{CO}_2$  exceeds the average between Feb-Jul (Fig. 7(a)) with reduced eddy transfer between Feb-Apr, associated with lower than average  $u_{\text{duct}}$  (Fig. 7(b)). Further, between Jun-Sep, there is weaker ascent (Fig. 7(c)) and north to south upper tropospheric wind (Fig. 7(d)) in the key regions  
295 defining  $\omega_p$  and  $v_p$ . As noted in FF18, the IH  $\Delta\text{CO}_2$  eddy and mean transports reinforce to contribute to the unprecedented 2009 to 2010 step in IH  $\Delta\text{CO}_2$ .
- In 2016, the IH  $\Delta\text{CO}_2$  is larger than average between Feb-Jun and smaller than average between Jul-Oct (Fig. 7(a)). These results are again consistent with the behaviour of the dynamical indices. There is reduced IH  $\Delta\text{CO}_2$  eddy transfer in the first half of the year (Fig. 7(b)) but very strong mean transport in  
300 the second half of the year (Figs. 7(c) and(d)) that accounts for the annual IH  $\Delta\text{CO}_2$ , as noted in FF18.
- In 1998, the IH  $\Delta\text{CO}_2$  exceeds the average from May-Dec and is close to the mean annual cycle for the rest of the year. We note from Figure 7 that the annual increase in IH  $\Delta\text{CO}_2$ , also shown in Figure 2 of FF18, is largely induced by the Jun-Aug mean Hadley circulation.
- It is suggestive that the relative variation in IH  $\Delta\text{CO}_2$  Feb-May for the three big El Niño years matches  
305 that in  $u_{\text{duct}}$ , however it is puzzling that the largest  $u_{\text{duct}}$  anomaly, 1998, is when IH  $\Delta\text{CO}_2$  is closest to the mean behaviour. The fact that the mean transport indices at this time of year are also consistently well below their long term average is also of note, since with  $u_{\text{duct}}$  close to zero and  $-\omega_p$ ,  $-v_p$  indicating descent and south to north meridional winds, there is no obvious mechanism for IH exchange in this

310 season. Yet, over the 25 years correlation of the Apr-May IH  $\Delta\text{CO}_2$  peaks with  $-\omega_p$ ,  $-v_p$  is significant,  $r \approx 0.4$ . One possible explanation for these behaviours in the early part of the Boreal winter/Austral summer may be found in changes in the volume of the well-mixed portion of the Northern Hemisphere (see Discussion, Section 7).

Different responses of IH  $\Delta\text{CO}_2$  to wind indices at different ENSO events, and from non-ENSO periods, are discussed in Section 7.

315 As an aside, we also include a similar plot for the average SH cgo-spo differences in Figure 8. Despite some concerns about artefacts in spo data (e.g. due to long storage times), all networks indicate that on average spo baseline  $\text{CO}_2$  exceeds that at cgo in the austral summer months. The minimum cgo-spo appears to precede inversion estimates of Southern Ocean  $\text{CO}_2$  uptake south of 30°S (Lenton et al., 2013). High precision continuous  $\text{CO}_2$  monitoring across the Southern Ocean (Stavert et al., 2019, and personal communication) 320 confirm small and relatively smooth seasonal variation. The earlier Nov-Dec minimum in  $\text{CO}_2$  difference coincides with a seasonal dip in fossil fuel emissions (Oda et al., 2017) perhaps indicating an alternative explanation.

## 6 Year-to-year variation in the composite records

The annual net impacts of the various potential influences on site IH  $\Delta\text{CO}_2$  (when typical terrestrial biosphere 325 seasonal variations are balanced) appear in Figure 9. The typical uncertainty in annual values obtained from combining composite standard deviations of normalised monthly values is  $\pm 0.03$  ppm, compared to  $\sim \pm 0.3$  ppm variation in the detrended annual record.

Working through Figure 9 from the left in order to highlight other systematic features:

- Except for 2016, every major El Niño (as indicated by the magnitude of the peak Oceanic Niño Index, 330 when  $\text{ONI} > 1$ , corresponds to a transition from low to high IH difference (conclusions are similar using Nino3 or Nino3.4). However, the  $\text{CO}_2$  response is not proportional to ONI, e.g. comparing 2009-10 to 1997-98, or most noticeably to 2015-16 (the strongest ONI but the smallest IH  $\Delta\text{CO}_2$  step).
- At the strong La Niña events ( $\text{ONI} < -1$ ) there is no clear indication of anomalous IH  $\Delta\text{CO}_2$ .
- There is remarkable stability in IH  $\Delta\text{CO}_2$  from 2010-2014 (despite the strong La Niña in 2011). After 335 2010, there are no significantly positive ONI anomalies (El Niños), and the 5-year increase of  $\sim 0.1$  ppm is lower than that generally attributed to the upward mean fossil fuel emissions; the 2010-2014 change in anthropogenic emissions (FF) is  $0.73 \text{ ppm yr}^{-1}$ , which at  $0.36 \text{ ppm} \cdot (\text{PgC})^{-1}$  would result in a  $0.26$  ppm increase. The FF with this scaling is shown at the top. There is markedly less variability (composite standard deviation of de-trended annual means  $\sim 0.04$  ppm) than any equivalent period over the previous 340 16 years ( $\sim 0.31$  ppm), or compared to that in the FF emissions.
- The 2009/2010 year-to-year change of  $\sim 0.8$  ppm (addressed in FF16 using CSIRO data only) remains the major year-to-year change in the annual records. The current composite data confirm the general FF16 conclusion.
- The linear regression through the 25-year mlo-cgo annual data gives a slope of  $0.067 \pm 0.006 \text{ ppm yr}^{-1}$  345 compared to that through monthly values of  $0.56 \pm 0.021 \text{ ppm yr}^{-1}$  in Figure 3, or through the peaks of  $0.087 \pm 0.011 \text{ ppm yr}^{-1}$  or the dips of  $0.049 \pm 0.011 \text{ ppm yr}^{-1}$ . We interpret this as indicating the combined long-term influence of both eddy and mean transport on the annual mean IH  $\Delta\text{CO}_2$ .

- In 2017, the IH difference is close to the 3-decade trend, with the duct open and Hadley strength returning to be close to its long-term mean.

350

## 7 Discussion

The composite monthly IH differences reveal variation from monthly to decadal time scales that exceed measurement and sampling error (as indicated by the composite standard deviations) thus requiring biogeochemical explanation. This discussion focusses on the potential of IH transport measured by wind indices to explain major features in IH  $\Delta\text{CO}_2$  variation, with emphasis on periods and events when they are likely to be the dominant influence on IH  $\Delta\text{CO}_2$ . It complements the more general statistical analyses in FF18. In Figure 6, decreasing  $u_{\text{duct}}$  acts to lessen eddy IH exchange and increase IH  $\Delta\text{CO}_2$ , while the increasing Hadley circulation (decreasing  $v_P$  and  $\omega_P$ ) decreases IH  $\Delta\text{CO}_2$ .

355

The fact that the magnitude of IH  $\Delta\text{CO}_2$  response varies greatly between the 1998, 2010 and 2016 El Niño events (with little or no eddy transfer occurring in boreal winter/spring in these years) is consistent with a quasi-decadal variation in the negative excursions of  $v_P$  and  $\omega_P$  in Figure 6 (most obvious in  $\omega_P$ ). In 1998 and 2010, the Hadley boreal summer/autumn indices are closer to zero, while 2016 registers an unprecedented negative excursion.

360

The complication of IH  $\Delta\text{CO}_2$  variations in the boreal winter/austral summer when  $u_{\text{duct}}$ ,  $\omega_P$  and  $v_P$  indices indicate that little or no IH exchange occurs (and  $u_{\text{duct}}$  closure tends to increase mlo  $\text{CO}_2$ ), is at a time when the north to south seasonal variation in the Inter-Tropical-Convergence-Zone (ITCZ) is near maximum. If NH peak terrestrial emissions (biospheric and industrial) at that time are diluted into a larger volume of well-mixed NH air, it could offset the mlo  $\text{CO}_2$  increase anticipated from  $u_{\text{duct}}$  closure. This volume effect is likely to be a second order effect in non-El Niño years.

365

NH terrestrial biosphere emission anomalies in the 2010-2014 period (Figure 4) are more variable than those in 2000-2005, the opposite of the relative behaviour in IH  $\Delta\text{CO}_2$  variability in Figure 9. These emissions are relatively small, and frequently occur after the larger IH  $\Delta\text{CO}_2$  anomalies, all inconsistent with a significant contribution to the composite IH differences; thus they are considered second order. The small 2010-2014 trend ( $\sim 0.1$  ppm compared to 0.26 ppm expected from fossil fuel emissions), and the steadily decreasing westerly wind strength in  $u_{\text{duct}}$  over the period, should increase IH  $\Delta\text{CO}_2$  over the fossil fuel trend (FF16). The flattening trend is consistent with the IH  $\Delta\text{CO}_2$  flux due to IH mixing by the Hadley process overwhelming the increases expected from Fossil Fuel combustion and from decreasing  $u_{\text{duct}}$  strength. There is a linear relationship between  $u_{\text{duct}}$  and equatorial upper troposphere transient kinetic energy shown in Fig. 6 of Frederiksen and Webster 1988 and discussed in FF16 and FF18. Note that in Figure 6, there is no precedent for similar sustained opposing behaviour in the two modes of IH transfer. The trend and lack of scatter in 2010-2014 IH  $\Delta\text{CO}_2$  can be understood by the IH  $\Delta\text{CO}_2$  fluxes being significantly larger than air-surface exchanges at the time.

370

375

380

The magnitude of the IH flux anomalies of up to  $\sim 2$  PgC month<sup>-1</sup> exceed known air-surface fluxes in the NH and are of a magnitude to significantly influence NH  $\text{CO}_2$  growth rate variability. With increasing fossil fuel fluxes, the role of IH exchange on the  $\text{CO}_2$  IH differences, and NH  $\text{CO}_2$  growth, is expected to become increasingly important.

385

The previous inability of carbon cycle models to simulate the 2009/2010 step (FF16, Supplementary Information) suggests that there is inadequate parameterisation of IH  $\Delta\text{CO}_2$  transfer, particularly by eddy

exchange, in some global carbon cycle models. If this is the case, then studies that interpret CO<sub>2</sub> behaviour during ENSO events as a guide to terrestrial biosphere responses to climate (e.g. Rödenbeck et al., 2018) will also be compromised. The ability to simulate the identified features of the composite IH ΔCO<sub>2</sub> (within the standard deviations) would provide convincing independent confirmation of atmospheric transport implementation.

## 8 Conclusions

Over the last 25 years there is a high degree of agreement in the measurement of monthly spatial differences in background CO<sub>2</sub> levels by three measurement laboratories using four different sampling methodologies and sampling frequencies. Geographic isolation of sample collection sites and consistent sophisticated background selection over the 25 years, as well as coincident monitoring of a wide range of atmospheric species, excludes local and regional influence on CO<sub>2</sub> at mlo, spo and cgo to an extent not generally available at other surface monitoring sites.

The temporal variation in the composite IH ΔCO<sub>2</sub> exhibit several systematic features on monthly to multi-year timeframes that are not reflected in independent evidence of air-surface exchange but do correspond to features in dynamical indices selected to represent both eddy and mean IH exchange. The comparisons in this paper imply a major role for IH exchange of CO<sub>2</sub> in NH growth rate variations.

The evidence for a significant influence of atmospheric dynamics on the CO<sub>2</sub> IH gradient has relevance for global carbon cycle studies. It implies that both eddy and mean transport processes, and volume effects, need to be specifically included in transport model simulations, since the balance between the two is constantly changing, particularly in El Niño periods when eddy transport is reduced. It also means that El Niño events may be a poor predictor of the carbon cycle behaviour in non-ENSO years.

Global carbon cycle model simulations should be able to reproduce the major features identified here in the composite IH records if the re-analyses transport is correctly implemented. In attempting to simulate the composite differences, one complication is model selection of baseline that matches the flask sampling criteria. While monthly baseline averages appear to succeed in this respect, a more comprehensive treatment (outside the scope of this study) based on individual flask measurements rather than monthly averages, and other trace gas observations (FF16, FF18), and in particular radon (Chambers et al., 2016), could possibly improve this process.

**Data availability.** Monthly average NOAA/ESRL, SIO and CSIRO CO<sub>2</sub> data were obtained respectively from:

[ftp://aftp.cmdl.noaa.gov/data/trace\\_gases/co2/flask/](ftp://aftp.cmdl.noaa.gov/data/trace_gases/co2/flask/)

[http://scrippsco2.ucsd.edu/data/atmospheric\\_co2/sampling\\_stations](http://scrippsco2.ucsd.edu/data/atmospheric_co2/sampling_stations)

<ftp://pftp.csiro.au/pub/data/gaslab/>. These data are also available from the Global Atmosphere Watch database

<https://gaw.kishou.go.jp/search>.

Ocean Nino Index data were obtained from

[https://origin.cpc.ncep.noaa.gov/products/analysis\\_monitoring/ensostuff/ONI\\_v5.php](https://origin.cpc.ncep.noaa.gov/products/analysis_monitoring/ensostuff/ONI_v5.php)

Meteorological data are available from the NOAA/ESRL website at <http://www.esrl.noaa.gov/psd/> (Kalnay et al., 1996)

**The Supplement** related to this article is provided

**Author contributions.**

RJF generated the composite records and their analyses while JSF provided information on atmospheric dynamics and the roles of transport mechanisms. LPS and RLL contributed CO<sub>2</sub> measurement quality assessments. All four authors contributed to the written document.

435 ***Competing interests.*** The authors declare that they have no conflicts of interest.

***Acknowledgements.***

440 We thank Ralph Keeling of SIO and Ed Dlugokencky of NOAA/ESRL for approval of our use of their CO<sub>2</sub>  
data; in particular we thank Ralph for his suggestion to include SIO data from the O<sub>2</sub>/N<sub>2</sub> program, and also Brad  
Hall from NOAA for information on the early NOAA data. The sustained focus and innovation of CSIRO  
GASLAB personnel, plus skilled trace gas sample collection by personnel at the Bureau of Meteorology Cape  
Grim Baseline Atmospheric Program, and NOAA personnel at Mauna Loa and South Pole stations underpin this  
445 work. From CSIRO: Vanessa Haverd was generous with her time in providing regional groupings and updates  
of the CABLE DVM data; Ying-Ping Wang also provided other DVM data for scrutiny; Paul Krummel and  
Nada Derek advised on data processing and graphics, and Cathy Trudinger and Rachel Law on the global  
carbon budget. The dynamics contributions were prepared using data and software from the NOAA/ESRL  
Physical Sciences Division website at <http://www.esrl.noaa.gov/psd/>

450 **References**

- Bastos, A., Freidlingstein, P., Sitch, S., Chi Chen, Mialon, A. Wigneron, J-P., Arora, V. K., Briggs, P.R., Canadell, J. G., Ciais, P., Chevallie, F., Lei Cheng, Delire, C., Haverd, V., Jain, A. K., Joos, F., Kato, E., Lienert, S., Lombardozi, D., Melto, J. R., Myneni, R., Nabel, J. E. M. S., Pongratz, J., Poulter, B., Rödenbeck, C., Séférian, R., Tian, H., van Eck, C., Viovy, N., Vuichard, N., Walker, A. P., Wiltshire, A., Jia Yang, Zaehle, S., Ning Zeng, and Zhu, D: Impact of the 2015/2016 El Niño on the terrestrial carbon cycle constrained by bottom-up and top-down approaches. *Phil. Trans. R. Soc. B* 373: 20170304. <http://dx.doi.org/rstb.2017.0304>, 2018.
- Bowman, K. P. and P. J. Cohen: Interhemispheric exchange by seasonal modulation of the Hadley Circulation, *J. Atmos. Sci.* 54, 2045-2059, 1997.
- 460 Chambers, S. D., Williams, A. G., Conen, F., Griffiths, A. D., Reimann, S., Steinbacher, M., Krummel, P. B., Steele, L. P., van der Schoot, M. V., Galbally, I. E., Molloy, S. B. and Barnes J. E.: Towards a Universal “Baseline” Characterisation of Air Masses for High- and Low-Altitude Observing Stations Using Radon-222, *Aerosol and Air Quality Research*, 16: 885–899, 2016, ISSN: 1680-8584 print / 2071-1409 online doi: 10.4209/aaqr.2015.06.0391, 2016.
- 465 Conway, T. J., Tans, P. P., Waterman, L. S., Thoning, K. W., Kitzis, D. R., Masarie, K. A. and Ni Zhang: Evidence for interannual variability of the carbon cycle from the National Oceanic and Atmospheric Administration/Climate Monitoring and Diagnostics Laboratory Global Air Sampling Network, *J. Geophys. Res.*, 99, 22,831-22,855, 1994.
- Dlugokencky, E. J., Lang, P.M., Masarie, K.A., Crotwell, A.M., and Crotwell, M.J.: Atmospheric Carbon Dioxide Dry Air Mole Fractions from the NOAA ESRL Carbon Cycle Cooperative Global Air Sampling Network, 1968-2013, Version: 2014-06-27, 2014. Path: [ftp://aftp.cmdl.noaa.gov/data/trace\\_gases/co2/flask/surface/](ftp://aftp.cmdl.noaa.gov/data/trace_gases/co2/flask/surface/)
- Dunse, B. L., Steele, L. P., Fraser, P. J. and Wilson, S. R.: An analysis of Melbourne pollution episodes observed at Cape Grim from 1995-1998, in *Baseline Atmospheric Program (Australia) 1997-1998*, edited by 475 N. W. Tindale, N. Derek, and R. J. Francey, Bureau of Meteorology and CSIRO Atmospheric Research, Melbourne, Australia, 34-42, 2001.
- Francey, R.J., Steele, L. P., Langenfelds, R. L., Lucarelli, M., Allison, C. E., Beardsmore, D. J. Coram, S. A., Derek, N., de Silva, F. R., Etheridge, D. M., Fraser, P. J., Henry, R. J., Turner, B. and Welch, E. D.: Global Atmospheric Sampling Laboratory (GASLAB): supporting and extending the Cape Grim trace gas programs. 480 *Baseline Atmospheric Program (Australia) 1993*. (eds. R.J. Francey, A.L. Dick and N. Derek) Bureau of Meteorology and CSIRO Division of Atmospheric Research, Melbourne, pp 8-29 (1996).
- Francey, R. J., & Frederiksen, J. S.: The 2009–2010 step in atmospheric CO<sub>2</sub> interhemispheric difference, *Biogeosciences*, 13, 873- 885, doi: 10.5194/bg-13-873-2016, 2016.
- Frederiksen, J. S. & Webster, P. J.: Alternative theories of atmospheric teleconnections and low-frequency 485 fluctuations, *Rev. Geophys.*, 26, 459-494, 1988.
- Frederiksen, J. S. and Francey, R. J.: Unprecedented strength of Hadley circulation in 2015–2016 impacts on CO<sub>2</sub> interhemispheric difference, *Atmos. Chem. Phys.*, 18, 14837-14850, <https://doi.org/10.5194/acp-18-14837-2018>, 2018.
- Haverd, V., Smith, B., Nieradzick, L., Briggs, P. R., Woodgate, W., Trudinger, C. M., Canadell, J. G., and Cuntz, 490 M.: A new version of the CABLE land surface model (Subversion revision r4601) incorporating land use and land cover change, woody vegetation demography, and a novel optimisation-based approach to plant

coordination of photosynthesis, *Geosci. Model Dev.*, 11, 2995-3026, <https://doi.org/10.5194/gmd-11-2995-2018>.

Jacob, D. J.: *Introduction to Atmospheric Chemistry*, Princeton University Press, 1999.

495 Kalnay, E., Kanamitsu, M., Kistler, R., Collins, W., Deaven, D., Gandin, L., Iredell, M., Saha, S., White, G., Woollen, J., Zhu, Y., Leetmaa, A., Reynolds, R., Chelliah, M., Ebisuzaki, W., Higgins, W., Janowiak, J., Mo, K. C., Ropelewski, C., Wang, J., Jenne, R., & Joseph, D.: The NCEP/NCAR Reanalysis 40-year Project, *Bull. Amer. Meteor. Soc.*, 77, 437-471, 1996

500 Keeling, R.F. and Schertz, S.R.: Seasonal and interannual variations in atmospheric oxygen and implications for the global carbon cycle, *Nature*, 358, 723-727, 1992.

Keeling C.D.: Rewards and penalties of monitoring the earth, *Annu. Rev. Energy Environ.* 1998. 23:25–82, 1998.

Keeling, C. D., Piper, S. C., Bacastow, R. B., Wahlen, M., Whorf, T. P., Heimann, M. and Meijer, H. A.: Exchanges of atmospheric CO<sub>2</sub> and <sup>13</sup>CO<sub>2</sub> with the terrestrial biosphere and oceans from 1978 to 2000. I. Global aspects, SIO Reference Series, No. 01-06, Scripps Institution of Oceanography, San Diego, 88 pages, 2001.

Kowalczyk, E. A., Wang Y. P., Law, R. M., Davies, H. L. McGregor, J. L. and Abramowitz, G.: The CSIRO Atmosphere Biosphere Land Exchange (CABLE) model for use in climate models and as an offline model. National Library of Australia Cataloguing-in-Publication, ISBN 1 921232 39 0 (pdf.), 2006.

510 Langenfelds, R. L., Francey, R. J., Steele, L. P., Dunse, B. L., Butler, T. M., Spencer, D. A., Kivlinghion, L. M., and Meyer, C. P.: Flask sampling from Cape Grim overflights, in *Baseline Atmospheric Program (Australia) 1999-2000*, edited by N. W. Tindale, N. Derek and P. J. Fraser, Bureau of Meteorology and CSIRO Atmospheric Research, Melbourne, Australia, 73-75, 2003.

Lenton, A., Tilbrook, B., Law, R. M., Bakker, D., Doney, S. C., Gruber, N., Ishii, M., Hoppema, M., Lovenduski, N. S., Matear, R. J., McNeil, B. I., Metzl, N., Mikaloff Fletcher, S. E., Monteiro, P. M. S., Rödenbeck, C., Sweeney, C., and Takahashi, T.: Sea-air CO<sub>2</sub> fluxes in the Southern Ocean for the period 1990–2009, *Biogeosciences*, 10, 4037-4054, <https://doi.org/10.5194/bg-10-4037-2013>, 2013.

Lintner, B. R., Gilliland, A. B. and Fung, I. Y.: Mechanisms of convection-induced modulation of passive tracer interhemispheric transport interannual variability, *J. Geophys. Res.*, 109, D13102, doi:10.1029/2003JD004306, 2004.

Le Quéré, C., Andrew, R. M., Friedlingstein, P., Sitch, S., Pongratz, J., Manning, A. C., Korsbakken, J. I., Peters, G. P., Canadell, J. G., Jackson, R. B., Boden, T. A., Tans, P. P., Andrews, O. D., Arora, V. K., Bakker, D. C. E., Barbero, L., Becker, M., Betts, R. A., Bopp, L., Chevallier, F., Chini, L. P., Ciais, P., Cosca, C. E., Cross, J., Currie, K., Gasser, T., Harris, I., Hauck, J., Haverd, V., Houghton, R. A., Hunt, C. W., Hurtt, G., Ilyina, T., Jain, A. K., Kato, E., Kautz, M., Keeling, R. F., Klein Goldewijk, K., Körtzinger, A., Landschützer, P., Lefèvre, N., Lenton, A., Lienert, S., Lima, I., Lombardozzi, D., Metzl, N., Millero, F., Monteiro, P. M. S., Munro, D. R., Nabel, J. E. M. S., Nakaoka, S.-I., Nojiri, Y., Padin, X. A., Peregón, A., Pfeil, B., Pierrot, D., Poulter, B., Rehder, G., Reimer, J., Rödenbeck, C., Schwinger, J., Séférian, R., Skjelvan, I., Stocker, B. D., Tian, H., Tilbrook, B., Tubiello, F. N., van der Laan-Luijkx, I. T., van der Werf, G. R., van Heuven, S., Viomy, N., Vuichard, N., Walker, A. P., Watson, A. J., Wiltshire, A. J., Zaehle, S., and Zhu, D.: Global Carbon Budget 2017, *Earth Syst. Sci. Data*, 10, 405–448, <https://doi.org/10.5194/essd-10-405-2018>, 2018.

Masarie, K. A., Langenfelds, R.L., Allison, C.E., Conway, T.J., Dlugokencky, E.J., Francey, R.J., Novelli, P.C., Steele, L.P., Tans, P.P., Vaughn, B. and White, J.W.C.: NOAA/CSIRO Flask Air Intercomparison

Experiment: A strategy for directly assessing consistency among atmospheric measurements made by  
535 independent laboratories, *Journal of Geophysical Research*, 106 (D17): 20445-20464, 2001.

Oda, T., Maksyutov, S., and Andres, R. J.: The Open-source Data Inventory for Anthropogenic Carbon dioxide  
(CO<sub>2</sub>), version 2016 (ODIAC2016): A global, monthly fossil-fuel CO<sub>2</sub> gridded emission data product for  
tracer transport simulations and surface flux inversions, *Earth Syst. Sci. Data Discuss.*,  
<https://doi.org/10.5194/essd-2017-76>, in review, 2017.

540 Ortega, S., Webster, P. J., Toma, V., & Chang, H. R.: The effect of potential vorticity fluxes on the circulation  
of the tropical upper troposphere, *Quart. J. Roy. Met. Soc.*, doi: 10.1002/qj.3261, 2018.

Pak, B. C., Langenfelds, R. L., Francey, R. J., Steele, L. P. and Simmonds, I.: A climatology of trace gases from  
the Cape Grim Overflights, 1992-1995, in *Baseline Atmospheric Program (Australia), 1994-95*, edited by R. J.  
Francey, A. L. Dick, and N. Derek, Bureau of Meteorology and CSIRO Division of Atmospheric Research,  
545 Melbourne, Australia, 41-52, 1996.

Randerson, J.T., van der Werf, G.R., Giglio, L., Collatz, G.J., and Kasibhatla, P.S.: Global Fire Emissions  
Database, Version 4.1 (GFEDv4). ORNL DAAC, Oak Ridge, Tennessee,  
USA. <https://doi.org/10.3334/ORNLDAAC/1293>, 2018.

Rödenbeck, C., Zaehle, S., Keeling, R., and Heimann, M.: How does the terrestrial carbon exchange respond to  
550 inter-annual climatic variations? A quantification based on atmospheric CO<sub>2</sub> data, *Biogeosciences*, 15, 2481-  
2498, <https://doi.org/10.5194/bg-15-2481-2018>, 2018.

Stavert, A. R., Law, R. M., van der Schoot, M., Langenfelds, R. L., Spencer, D. A., Krummel, P. B., Chambers,  
S. D., Williams, A. G., Werczynski, S., Francey, R. J., and Howden, R. T.: The Macquarie Island [LoFlo2G]  
high-precision continuous atmospheric carbon dioxide record, *Atmos. Meas. Tech.*, 12, 1103-1121,  
555 <https://doi.org/10.5194/amt-12-1103-2019>, 2019.

Sturm, P., Leuenberger, M., Sirignano, C. R., Neubert, R. E. M., Meijer, H. A. J., Langenfelds, R., Brand, W. A.  
and Tohjima, Y.: Permeation of atmospheric gases through polymer O-rings used in flasks for air sampling, *J.*  
*Geophys. Res.* 109, D04309, doi:10.1029/2003JD004073, 2004.

Tans, P. P., Conway, T. J., Dlugokencky, E. J., Thoning, K. W., Lang, P. M., Masarie, K. A., Novelli, P., and  
560 Waterman, L. S.: 2. Carbon Cycle Division, 2.1 Continuing Programs. Climate Monitoring and Diagnostics  
Laboratory, 20, 15-24, 1992.

Thoning, K. W., Tans, P. P. and Komhyr, W. D.: Atmospheric Carbon Dioxide at Mauna Loa Observatory 2.  
Analysis of the NOAA GMCC Data, 1974-1985, *J. Geophysical Research*, 94, D6, 8549-8565, 1989

Webster, P. J., and Holton, J. R.: Cross-equatorial response to mid-latitude forcing in a zonally varying basic  
565 state, *J. Atmos. Sci.*, 39, 722-733, 1982.

Yue, C., Ciais, P., Bastos, A., Chevallier, F., Yin, Y., Rödenbeck, C., and Park, T.: Vegetation greenness and  
land carbon-flux anomalies associated with climate variations: a focus on the year 2015, *Atmos. Chem. Phys.*,  
17, 13903-13919, <https://doi.org/10.5194/acp-17-13903-2017>, 2017

Zhao, C. L. and Tans, P. P.: Estimating uncertainty of the WMO mole fraction scale for carbon dioxide in air,  
570 *Journal of Geophysical Research: Atmospheres*, 111(D8), 10.1029/2005JD006003,  
<http://dx.doi.org/10.1029/2005JD006003>, d08S09, 2006.

## Figure Captions

575 **Figure 1:** Monthly CO<sub>2</sub> differences (in ppm) from NOAA for sites mlo, cgo and spo and networks SIO1, SIO2 and CSIRO. 5-month running means are highlighted. 1996-2016 mean and standard deviation (bracketed) values are included.

**Figure 2:** Three-month averaged CO<sub>2</sub> differences between sites for each of the four sampling networks. (Each 3-month average is plotted on Jan 1 of the appropriate year.

580 **Figures 3:** Composite station difference data showing the network ensemble average and standard deviation of monthly CO<sub>2</sub> for (a) mlo-spo, (b) mlo-cgo and (c) cgo-spo (on a doubly expanded scale). Linear regressions through the IH records are black-dotted lines. Spline polylines link peaks (blue, solid) and dips (red, dotted) of the seasonal IH differences. Shaded gray rounded rectangles indicate El Niño periods with strongly anomalous equatorial zonal winds.

585 **Figure 4:** Comparison of the timing and amplitude of terrestrial emission anomalies (i.e. mean seasonality subtracted) with variations of the peaks and dips in Figure 3. (a) seasonal anomalies in CABLE emissions (dark green) and in 16-DGVM TRENDY extra-tropical emissions (Bastos et al., 2018; light green) and (b) GFED4.1 wild fire seasonal anomalies, for NH (green), EQ (pink) and SH (blue, SH/EQ for GFED4.1). In (c) The largest anomalies (CABLE NH, CABLE EQ, and GFED4.1 EQ) on the left axis are compared to the ppm variation in peaks (red) and dips (blue) on separate right axes. The axes scaling equates 1 PgC with 1 ppm (see text). Figure 590 4(d) shows the standard deviation in the seasonal anomalies for each month, including those in anthropogenic emissions (Oda et al., 2017).

**Figure 5:** Schematic of the boundaries and altitudes of regions used in FF18 to define wind indices that describe eddy IH transfer ( $u_{\text{duct}}$ , westerlies positive) and mean transfer (uplift, negative  $\omega_p$ ) and north to south transfer (negative  $v_p$ ). The shaded area brackets the austral summer extent of the Inter Tropical Convergence Zone in the south (blue dash) and boreal summer extent in the north (red dash). 595

**Figure 6:** Monthly values of (a)  $u_{\text{duct}}$ , (b)  $\omega_p$  and (c)  $v_p$ . The shading to zero indicates months of enhanced transport which act to reduce the IH  $\Delta\text{CO}_2$ . Anomalous dynamical periods are highlighted with gray shaded rectangles.

600 **Figure 7:** The monthly averages of dynamical factors governing CO<sub>2</sub> IH exchange over the last 25 years. (a) detrended CO<sub>2</sub> partial pressure differences mlo-cgo (green), (b) Pacific eddy transport index  $u_{\text{duct}}$  (dark blue), (c) Pacific Hadley transport indicated by uplift at 10-15°N ( $-\omega_p$ , light red) and (d) North to South transport ( $-v_p$ , dark red). On average, coincidence of shading in wind indices and shaded months of IH  $\Delta\text{CO}_2$  is a precondition for increased IH mixing (reduced IH gradient). The more anomalous transport years, 1998 (dots), 2010 (dashes) 605 and 2016 (black line) are shown for each wind index, and for mlo-cgo IH  $\Delta\text{CO}_2$ .

**Figure 8:** Composite 25-year average of monthly baseline cgo-spo CO<sub>2</sub> (dark blue). Individual network values are shown in orange (NOAA), dark blue (SIO2) and CSIRO (black). Estimates of sea-air CO<sub>2</sub> flux seasonality are shown in light blue.

610 **Figure 9:** Annual changes in the baseline CO<sub>2</sub> difference between sites. Interhemispheric differences are plotted on the left axis. The peak magnitudes of a strong El Niño (brown, ONI index > 1) and a strong La Niña (purple, ONI index < -1) are indicated. The cgo-spo annual differences are plotted on a doubled right-hand scale. Annual Fossil Fuel emissions from FF18, are shown on the top right axis.

615 **Table**

| # networks | four | three | two | one |
|------------|------|-------|-----|-----|
| mlo-cgo    | 0    | 293   | 19  | 0   |
| mlo-spo    | 266  | 42    | 4   | 0   |
| cgo-spo    | 0    | 279   | 31  | 2   |

Table 1: Number of months of data available for composite differences at the baseline sites.

## Figures

625 **Figure 1:** Monthly CO<sub>2</sub> differences (in ppm) from NOAA for sites mlo, cgo and spo and networks SIO1, SIO2 and CSIRO. 5-month running means are highlighted. 1996-2016 mean and standard deviation (bracketed) values are included.



630 **Figure 2:** Three-month averaged CO<sub>2</sub> differences between sites for each of the four sampling networks. (Each 3-month average is plotted on Jan 1 of the appropriate year.)



**Figures 3:** Composite station difference data showing the network ensemble average and standard deviation of monthly CO<sub>2</sub> for (a) mlo-cgo, (b) mlo-spo and (c) cgo-spo (on a doubly expanded scale). Linear regressions through the IH records are black-dotted lines. Spline polylines link peaks (blue, solid) and dips (red, dotted) of the seasonal IH differences. Shaded gray rounded rectangles indicate El Niño periods with strongly anomalous equatorial zonal winds.



**Figure 4:** Comparison of the timing and amplitude of terrestrial emission anomalies (i.e. mean seasonality subtracted) with variations of the peaks and dips in Figure 3. (a) seasonal anomalies in CABLE emissions (dark green) and in 16-DGVM TRENDY extra-tropical emissions (Bastos et al., 2018; light green) and (b) GFED4.1 wild fire seasonal anomalies, for NH (green), EQ (pink) and SH (blue, SH/EQ for GFED4.1). In (c) The largest anomalies (CABLE NH, CABLE EQ, and GFED4.1 EQ) on the left axis are compared to the ppm variation in peaks (red) and dips (blue) on separate right axes. The axes scaling equates 1 PgC with 1 ppm (see text). Figure 4(d) shows the standard deviation in the seasonal anomalies for each month, including those in



anthropogenic emissions (Oda et al., 2017).

650 **Figure 5:** Schematic of the boundaries and altitudes of regions used in FF18 to define wind indices that describe eddy IH transfer ( $u_{\text{duct}}$ , westerlies positive) and mean transfer (uplift, negative  $\omega_p$ ) and north to south transfer (negative  $v_p$ ). The shaded area brackets the austral summer extent of the Inter Tropical Convergence Zone in the south (blue dash) and boreal summer extent in the north (red dash).



**Figure 6:** Monthly values of (a)  $u_{duct}$ , (b)  $\omega_p$  and (c)  $v_p$ . Shading indicates months of enhanced transport which acts to reduce the IH  $\Delta CO_2$ . Anomalous dynamical periods are highlighted with gray shaded rectangles.



660 **Figure 7:** The monthly averages of dynamical factors governing CO<sub>2</sub> IH exchange over the last 25 years. (a) detrended CO<sub>2</sub> partial pressure differences mlo-cgo (green), (b) Pacific eddy transport index  $u_{duct}$  (dark blue), (c) Pacific Hadley transport indicated by uplift at 10-15°N ( $-\omega_p$ , light red) and (d) North to South transport ( $-v_p$ , dark red). On average, coincidence of shading in wind indices and shaded months of IH  $\Delta CO_2$  is a precondition for increased IH mixing (reduced IH gradient). The more anomalous transport years, 1998 (dots), 2010 (dashes) and 2016 (black line) are shown for each wind index, and for mlo-cgo IH  $\Delta CO_2$ .

665



670 **Figure 8:** Individual network values of monthly cgo-spo  $\Delta\text{CO}_2$  that contribute to the composite are shown in orange (NOAA), dark blue (SIO2) and CSIRO (black). Estimates of sea-air  $\text{CO}_2$  flux seasonality south of  $30^\circ\text{S}$  are shown in light blue.



675



680 **Figure 9:** Annual changes in the baseline CO<sub>2</sub> difference between sites. Interhemispheric differences are plotted on the left axis. The peak magnitudes of a strong El Niño (brown, ONI index > 1) and a strong La Niña (purple, ONI index < -1) are indicated. The cgo-spo annual differences are plotted on a doubled right-hand scale. Annual Fossil Fuel emissions from FF18, are shown on the top right axis.
